1 Research

2

3 The COVID-19 pandemic has increased health inequalities by  
4 altering patterns of engagement with a mass participation event  
5 after resumption post-lockdown

6

7 Andre S. Gilburn\*

8 Healthy Environments: Sustainable Societies Research Group, Biological and Environmental  
9 Sciences, University of Stirling, Stirling UK

10

11 \*\*Corresponding author: [andre.gilburn@stir.ac.uk](mailto:andre.gilburn@stir.ac.uk)

12

13 Short title: Impacts of the pandemic on physical activity continue after lockdown

14

15

## 16 Abstract

17 The global epidemic in physical inactivity has been exacerbated by lockdowns with  
18 concerning health inequalities accentuated as a result. Studies are needed of post-lockdown  
19 levels of activity to determine if there are lasting impacts beyond lockdown. This study uses  
20 parkrun in Scotland as a model system to address this urgent question. Generalised linear  
21 mixed models were used to identify patterns in the attendance, gender, age and  
22 performance of 500,000+ parkrun participations in Scotland for the year before the pandemic  
23 and the first year after lockdown. Total weekly attendance in Scotland had been increasing  
24 year-on-year but fell by 13% from 7,649 (95% CI 7,275 to 8,024) in the final-year pre-  
25 lockdown to 6,612 (95% CI 6,260 to 6,963) in the first-year post-lockdown. Attendance drops  
26 were disproportionately larger at events with larger attendances prior to lockdown. There  
27 was a disproportionate loss of female participants in more deprived areas. The gender gap  
28 in participation had been narrowing before lockdown but widened from 54.02% (95% CI  
29 53.85 to 54.19%) in the final-year pre-lockdown to 56.29% male (95% CI 56.09 to 56.49%) in  
30 the first-year post-lockdown. The age of participants increased from 44.94 (95% CI 44.90 to  
31 44.98) before lockdown to 46.58 (95% CI 46.53 to 46.64) after lockdown. The age gap  
32 between the genders widened after lockdown particularly at larger events and in more  
33 deprived areas. Performance was declining before lockdown but increased from 55.02%  
34 (95% CI 54.96 to 55.06%) to 55.93% (95% CI 55.88 to 55.97%) after lockdown. The  
35 pandemic has reduced attendance at parkrun in Scotland and the loss of participants has  
36 been non-random increasing health inequalities affecting women, the least fit and those in  
37 deprived areas. Some former participants are also now avoiding larger mass participation  
38 events. Investment and management strategies will be needed to address these worsening  
39 inequalities.

40 Keywords: parkrun, pandemic, social deprivation, simd, physical activity

41

42

## 43 Introduction

44 Variation in levels of physical activity have been found to be driving health inequalities  
45 highlighting the importance of tracking levels of activity and identifying correlates of activity  
46 among populations [1–3]. The COVID-19 pandemic had a major impact on levels of physical  
47 activity [4–15]. Among the identified impacts of lockdown is an avoidance of larger events  
48 found in runners in Greece [4]. A study tracking physical activity levels in the UK found it  
49 declined 37% during lockdown, although the impacts varied with age, with older individuals  
50 more likely to maintain their pre-lockdown levels of activity than younger adults [5]. The  
51 impacts of the pandemic have also been found to vary with socio-economic background with  
52 those in deprived areas finding it hardest to access places to exercise during lockdowns [6–  
53 8]. By contrast, a study of levels of physical activity in Kenya found that people from higher  
54 social classes were more likely to have reduced their activity during lockdown and this was  
55 particularly the case for females [14]. A study of factors associated with physical activity  
56 during lockdown in Australia noted the importance of connections to an exercise group for  
57 older adults to maintain or even increase levels of activity [15]. The impacts of the pandemic  
58 on levels of physical activity exacerbate the pre-existing problem with 1.4 billion adults  
59 estimated to have been doing too little physical exercise prior to the pandemic [16]. This had  
60 resulted in the promotion of wider participation in sport becoming a global priority [17]. The  
61 negative impact of the pandemic on levels of physical fitness has only served to increase  
62 this global priority. This leaves a key question. If lockdown impacted the demographics of  
63 those engaging in physical exercise do those impacts extend into the post-lockdown era  
64 [10]? Large-scale studies investigating changes in the patterns of exercising are urgently  
65 needed to address this question [12].

66 One very large dataset on activity levels is the parkrun results database. parkrun provide  
67 free weekly 5km events at nearly 2,000 locations generating data for close to 100,000  
68 events annually. There is huge potential for using parkrun as a model system for  
69 investigating changes in the demographics of those engaging in physical activity and  
70 identifying correlates of activity. Several studies have investigated the parkrun results  
71 database [18–21] and some studies have identified correlates of participation on a very large  
72 scale [22–28]. Few studies though have investigated changes in the demographics of  
73 parkrun participants over time [22,29].

74 A survey of the behaviour of previous parkrun participants during lockdown found reduced  
75 activity levels [29]. Increased inactivity during lockdown was particularly evident in younger  
76 adults, people in deprived areas and the least active [29]. Consequently, the changing  
77 patterns in activity among parkrun participants during lockdown are consistent with those  
78 identified in other studies [4–8] revealing the potential value of using parkrun as a model  
79 system. As more than 50,000 parkrun events have taken place in the UK alone since  
80 lockdown ended a huge database has been generated on post-lockdown activity levels at a  
81 mass participation event that not only has a key aim of encouraging the least active to  
82 engage in physical activity but is also actively involved with social prescribing [30–32]. This  
83 allows a unique opportunity to investigate what lasting impacts lockdowns have had on  
84 levels and correlates of physical activity after they have been lifted and how lockdown might  
85 have altered the demographic of parkrun participants. This is particularly important as  
86 lockdowns are likely to have increased inequalities in social prescription [33].

87 A previous study of all parkrun events in Scotland from 2004-2019 revealed various  
88 changing correlates of participation with a narrowing gender ratio, reducing performance  
89 scores and an increasing mean age of participants [22]. Another study of factors affecting  
90 the likelihood of returning to parkrun for new participants in Scotland found that they are less  
91 likely to return after attending larger events [28]. The pandemic could have increased risk

92    averse behaviour and exacerbated avoidance of larger parkrun events. The aim of this study  
93    is to investigate how lockdown has impacted these changing demographics and correlates of  
94    participation at parkrun in Scotland. Scotland has a range of different parkrun types from city  
95    centre parks to remote island locations. Scottish parkrun locations also show considerable  
96    variation in the level of deprivation of the surrounding areas in which they are located. This  
97    makes Scottish parkrun events an ideal model system for investigating lasting impacts of  
98    lockdown on the levels of physical activity by comparing characteristics of participants before  
99    and after lockdown. Scottish parkrun events also vary considerably in their mean number of  
100   attendees allowing an assessment of whether some former participants are not avoiding  
101   larger parkrun events to reduce the risk of exposure to COVID-19.

102

## 103    **Methods**

104    This was an analytical study of aggregated publicly available secondary data. There was no  
105    primary data collection and no active participants.

106

## 107    **Data sources**

108    The primary data source was the parkrun results for events that occurred in Scotland in the  
109    year immediately prior to lockdown (16<sup>th</sup> March 2019 to 14<sup>th</sup> March 2020) and the year  
110    immediately after the resumption (14<sup>th</sup> August 2021 to 13<sup>th</sup> August 2022). Data from 44  
111    events were included. These were all the events that were in existence one year prior to the  
112    start of the pandemic and which also returned after lockdown. The results for each event  
113    were processed using an Excel macro which extracted gender, age category and age  
114    graded performance score for all participants [34]. Age is provided as a 5-year cohort for  
115    adults except for 18-19 year olds. Age was converted to a continuous variable by assigning

116 participants the mid-point for their cohort group. Only adult participants were included in the  
117 study. Gender is assigned by participants. Only participants selecting male or female were  
118 included in the study as age graded performance scores are not provided by parkrun for  
119 other gender options. The Scottish Index of Multiple Deprivation (simd) 2020 was  
120 determined for the data zone within which each parkrun is located [35]. Scotland is  
121 separated into 6,976 data zones which are ranked from the most deprived to the least  
122 deprived, based upon income, employment, education, health, access to services, crime and  
123 housing [35]. Event size was calculated from the mean attendance at each event for the year  
124 prior to the pandemic.

125

## 126 Data analysis

127 The data were analysed using R x64 4.1.1 [36]. A generalised linear mixed model (GLMM)  
128 of event attendance in Scotland in the year prior to lockdown and the first year after return  
129 from lockdown was generated using the lme4 function [37]. Prior to modelling event  
130 attendances were transformed to natural logarithms. This not only made the data fit a  
131 Gaussian distribution but also allowed direct comparison between the rate of change in  
132 attendance across events of different sizes. All continuous explanatory variables (date,  
133 mean event size and simd ranking) were scaled to have a mean of zero and a standard  
134 deviation of one. In addition, a binary variable denoting whether the event was pre- or post-  
135 lockdown was included. Event location was included as a random effect. Minimum Akaike  
136 Information Criterion was used to select the optimal model [37].

137 GLMMs were generated for gender, age and performance of participants for the participant  
138 dataset. Event location was again used as random effect. A binomial error distribution was  
139 used for the model of gender. The simd of the area within which event is located and the

140 mean attendance for the year prior to lockdown were included as predictor variables after  
141 scaling to have a mean of 0 and a standard deviation of 1.

142

143

## 144 Results

145 The impact of the COVID-19 lockdown on attendance at Scottish  
146 parkrun events

147 Prior to lockdown attendances in Scotland had been increasing exponentially (Figure 1) but  
148 a comparison of mean total attendance for the last year of parkrun in Scotland prior to the  
149 pandemic (7,649, 95% CI 7,275 to 8,024) and the first-year post-lockdown (6,612, 95% CI  
150 6,260 to 6,963) reveals a more than 13% decline. A model of the attendance at individual  
151 events revealed a significant interaction between lockdown and event size revealing that  
152 declines in attendance were disproportionately larger at larger events ( $\beta=-0.039$ ;  $p<0.001$ ).

153

154 Fig 1. Total attendance on each parkrun day in Scotland from day 0, 6<sup>th</sup> December 2008 until  
155 March 18<sup>th</sup> 2023.

156

157 The impact of COVID-19 lockdown on the gender ratio of participants at  
158 Scottish parkrun events

159 A total of 554,696 participations at parkrun events in Scotland a year either side of lockdown  
160 were included in the models consisting of 305,123 male participations and 249,573 female.

161 Prior to lockdown the gender gap in participation at Scottish parkrun events had been

162 narrowing [22]. A generalised linear model of gender ratio using a binomial error distribution  
163 and including event location as a random effect revealed a highly significant increase ( $\beta$   
164 =0.088;  $p<0.001$ ) in the gender ratio from 54.02% male (95% CI 53.85 to 54.19%) in the  
165 year prior to lockdown to 56.29% male (95% CI 56.09 to 56.49%) in the year after lockdown.  
166 An interaction term identified a significantly greater increase in gender ratio at larger events  
167 after lockdown ( $\beta=0.080$ ;  $p=0.007$ ). Separating event size into small and large based upon  
168 whether the scaled score for each event was positive (high) or negative (low) shows an  
169 increase in the gender ratio from 52.87% male (95% CI 52.63 to 53.10) before lockdown to  
170 54.96% male (95% CI 54.70 to 55.23) after lockdown at small events and an increase in the  
171 gender ratio from 55.44% male (95% CI 55.18 to 55.70) before lockdown to 54.96% male  
172 (95% CI 57.67 to 58.27) after lockdown at large events.

173

174

## 175 The impact of COVID-19 lockdown on the age of participants at Scottish 176 parkrun events

177 There had been a trend towards an increase in the age of participants prior to lockdown in  
178 Scotland and a narrowing age gap between the genders [22]. A GLMM (Table 1) of the age  
179 of participants identified an increase in age of participants from 44.94 (95% CI 44.90 to  
180 44.98), in the year before lockdown to 46.58 (95% CI 46.53 to 46.64) in the year after  
181 lockdown. A previous study reported an age gap between the sexes with male participants  
182 being on average older than female participants [22]. The model found the age gap between  
183 the genders has widened after lockdown (males: before lockdown 46.08 (95% CI 46.02 to  
184 46.14), after lockdown 47.75 (95% CI 47.68 to 47.82); females: before lockdown 43.61 (95%  
185 CI 46.54 to 46.67), after lockdown 45.08 (95% CI 45.01 to 45.16). Larger events had a



186 younger demographic, and this was more pronounced in female participants. More deprived  
 187 areas had an older demographic than less deprived areas prior to lockdown although this  
 188 association reversed after lockdown in female participants (Table 2). There was also a  
 189 disproportionate loss of female participants in more deprived areas and male participants in  
 190 less deprived areas after lockdown ( $\chi^2=6.26$ ;  $p=0.012$ , Table 2).

191

192 **Table 1.** A general linear mixed model of the age of participants at Scottish parkrun events  
 193 for the year before and the year after lockdown. Event location was included as a random  
 194 effect. All continuous explanatory variables were scaled. Event size was the mean  
 195 attendance at each event over the last year prior to lockdown.

196

| Parameter                          | Estimate | SE    | P value |
|------------------------------------|----------|-------|---------|
| Intercept                          | 43.58    | 0.279 | <0.001  |
| Gender (Male)                      | 2.563    | 0.045 | <0.001  |
| Lockdown (Post)                    | 1.442    | 0.050 | <0.001  |
| Event size                         | -1.126   | 0.288 | <0.001  |
| Simd                               | 0.437    | 0.259 | 0.010   |
| Gender (Male)*Event size           | 0.443    | 0.035 | <0.001  |
| Lockdown (Post)* Simd              | -0.173   | 0.051 | <0.001  |
| Lockdown (Post)*Gender (Male)      | 0.199    | 0.068 | 0.003   |
| Gender (Male)*Simd                 | -0.002   | 0.046 | 0.962   |
| Lockdown (Post)*Gender (Male)*Simd | 0.286    | 0.068 | <0.001  |

197

198

199 **Table 2.** The mean age and gender of participants at parkrun in Scotland in the year before  
 200 and after lockdown in low and high deprivation areas. Simd was separated into high and low  
 201 deprivation based upon whether the scaled score for each event was positive (low) or  
 202 negative (high).

203

| Lockdown | Simd | Gender | N      | Mean  | 95% CI         |
|----------|------|--------|--------|-------|----------------|
| Pre      | high | Female | 70 578 | 43.46 | 43.37 to 43.55 |
| Post     | high | Female | 52 041 | 45.16 | 45.05 to 45.27 |
| Pre      | high | Male   | 84 190 | 45.90 | 45.82 to 45.98 |
| Post     | high | Male   | 66 929 | 47.54 | 47.44 to 47.64 |
| Pre      | low  | Female | 73 529 | 43.74 | 43.65 to 43.82 |
| Post     | low  | Female | 53 425 | 45.00 | 44.89 to 45.11 |
| Pre      | low  | Male   | 85 104 | 46.26 | 46.17 to 46.34 |
| Post     | low  | Male   | 68 900 | 47.95 | 47.85 to 48.04 |

204

205

206 **The Impact of COVID-19 lockdown on the Performance of Participants**  
 207 **at Scottish parkrun Events**

208

209 There has been a trend towards a reduction in the performance of participants prior to  
 210 lockdown in Scotland [22] as parkrun has become more inclusive to the less active. After  
 211 lockdown that trend reversed with a GLMM (Table 3) identifying a highly significant increase  
 212 in performance from 55.02% (95% CI 54.96-55.06%) pre-lockdown to 55.93% 95% CI 55.88  
 213 to 55.97%) after lockdown. The model identified that performance was positively correlated  
 214 with age, being male and event size. Significant interaction terms revealed a narrowing

215 gender gap in performance with increasing age, event size and levels of deprivation,  
 216 together with a narrowing of the gender gap in performance after lockdown (males: before  
 217 lockdown 56.90%; 95% CI 56.85-56.95, after lockdown 57.49; 95% CI 57.43 to 57.54;  
 218 females: before lockdown 52.82; 95% CI 52.76 to 52.87, after lockdown 53.92; 95% CI 53.85  
 219 to 53.98). The model also revealed an increase in the performance gap between high and  
 220 low deprivation areas after lockdown (Table 4).

221

222 **Table 3.** A general linear mixed model of the age graded performance score of participants  
 223 at Scottish parkrun events for the year before and the year after lockdown. Event location  
 224 was included as a random effect. All continuous explanatory variables were scaled. Event  
 225 size was the mean attendance at each event over the last year prior to lockdown.

226

| Parameter                     | Estimate | SE    | P value |
|-------------------------------|----------|-------|---------|
| Intercept                     | 53.21    | 0.319 | <0.001  |
| Age                           | 2.914    | 0.027 | <0.001  |
| Gender (Male)                 | 3.485    | 0.036 | <0.001  |
| Lockdown (Post)               | 0.798    | 0.041 | <0.001  |
| Event size                    | 1.014    | 0.326 | 0.003   |
| Simd                          | -0.188   | 0.302 | 0.536   |
| Gender (Male)*Age             | -1.163   | 0.037 | <0.001  |
| Gender (Male)*Event size      | -0.484   | 0.028 | <0.001  |
| Lockdown (Post)*Gender (Male) | -0.404   | 0.054 | <0.001  |
| Lockdown (Post)*Age           | 0.255    | 0.041 | <0.001  |
| Gender (Male)*Simd            | 0.156    | 0.028 | <0.001  |
| Lockdown (Post)*Event size    | 0.149    | 0.031 | <0.001  |

|                                   |        |       |        |
|-----------------------------------|--------|-------|--------|
| Lockdown (Post)*Simd              | -0.117 | 0.028 | <0.001 |
| Simd*Event size                   | 0.312  | 0.289 | 0.286  |
| Lockdown (Post)*Gender (Male)*Age | -0.420 | 0.054 | <0.001 |
| Lockdown (Post)* Simd*Event size  | 0.127  | 0.026 | <0.001 |

227

228 **Table 4.** The mean age graded performance score of participants at parkrun events in  
 229 Scotland in the year before and after lockdown. Events were separated into low and high  
 230 simd based upon whether the scaled score for each event was positive (high) or negative  
 231 (low).

232

| Lockdown | Simd | Age Graded Performance Score | N       | 95% CI         |
|----------|------|------------------------------|---------|----------------|
| Pre      | low  | 54.70                        | 154 768 | 54.64 to 54.75 |
| Pre      | high | 55.34                        | 158 633 | 55.29 to 55.39 |
| Post     | low  | 55.68                        | 118 970 | 55.62 to 55.74 |
| Post     | high | 56.16                        | 122 325 | 56.10 to 56.22 |

233

234

## 235 Discussion

236 The findings are consistent with previous studies that have identified that COVID-19  
 237 pandemic lockdowns reduced levels of physical activity particularly for the young, the less fit  
 238 and those in most deprived areas [4–9,29]. The current study has identified that these  
 239 patterns have continued into the post-lockdown period in a mass participation event in  
 240 Scotland. The study has also identified some new correlates of activity and new patterns of  
 241 association in existing correlates.

242 Overall attendances are well down on where they would have been had they continued to  
243 increase at pre-pandemic rates. The models identify several changes in correlates with  
244 participation levels after lockdown which help identify the changing demographics of parkrun  
245 attendees. A previous study identified that among parkrun participants from before the  
246 pandemic that the activity levels had particularly declined in younger adults, the least active  
247 and those in more deprived areas during lockdown [29]. The current study reveals the  
248 concerning finding that these impacts also extend into the post-lockdown period.

249 Furthermore, additional impacts were identified with a substantial shift in the gender ratio  
250 with a higher rate of loss of female participants. These means that several existing health  
251 inequalities have now only been exacerbated by lockdown but also that these impacts have  
252 extended into the post-lockdown era.

253 A number of important correlates of levels of participation were identified that help shed light  
254 on why some of these health inequalities have increased. The widening age gap between  
255 the genders suggests that there has been a bias towards the loss of females amongst older  
256 participants. The narrowing performance gap between the genders suggests that it is the  
257 least fit female participants that have stopped attending. The widening gender age gap at  
258 larger events suggests that there has also been a bias in the loss of older females from  
259 larger events. This seems to be particularly the case in the least deprived parts of Scotland.  
260 This could be related to older, less fit women avoiding more crowded parkruns to reduce  
261 their risk of contracting COVID-19. Both age and fitness are associated with the increasing  
262 risks of contracting COVID-19 [38,39] so it appears that older, less fit females could be more  
263 risk averse and are avoiding busier events. This is consistent with a study in Kenya that  
264 found that women in higher social classes were the most likely to reduce their levels of  
265 physical activity during lockdown [14]. The increasing gender gap in age at events in the  
266 least derived areas could be related to better awareness of the risks of contacting covid. The  
267 finding that smaller events had the greatest increase in age also suggests that older  
268 participants have altered their attendance patterns to avoid large crowds. This suggests that

269 parkrun and other similar event organisers should continue to provide additional events in  
270 areas where attendances at existing events are high.

271 The study revealed a bias in age of participants with a younger demographic at larger  
272 parkruns and those in more deprived areas. The lack of places to exercise in more deprived  
273 areas might have pushed younger adults out of the exercise habit during lockdown [6–8].  
274 These findings suggest it is increasingly important for governments to put in place measures  
275 to encourage younger adults to participate in more physical activity post-lockdown [5]. The  
276 same can be applied to those from more deprived areas and the less fit. parkrun is an  
277 extremely effective and relatively cheap mechanism of improving public health and well-  
278 being so government interventions to help parkrun make up for the time lost to the pandemic  
279 and reverse its impacts are now required. Studies have shown that the health benefits of  
280 moderate and mild sport are particularly high and that there is likely to be great value gained  
281 from organisations such as parkrun in stimulating the less active to engage in more activity,  
282 so public funding to support and aid recovery after lockdown is key to mitigate the impacts of  
283 the pandemic [40]. Furthermore, a study in China has shown that physical activity before the  
284 pandemic significantly improved the outcome of those infected with COVID-19 showing a  
285 community and population benefit to physical activity which makes the population more  
286 resilient to future waves of COVID-19 and other potential pandemic events [38]. Studies  
287 have also shown for older adults how important the social aspect of being part of a regular  
288 exercise group, this is something that parkrun excels at providing [15]

289         Studies have also found that those in more vulnerable groups were the most likely to  
290 reduce their physical activity levels and avoid green spaces during lockdown [39]. The  
291 findings of the current study are entirely consistent with this as it is the lowest performing  
292 parkrun participants from before lockdown who are the least likely to have returned, yet they  
293 are those most likely to benefit from participation. There needs to be approaches developed  
294 to encourage those who reduced their level of physical activity as a result of fear of catching

295 COVID-19 back into engaging with more exercise. One key demographic affected by this  
296 appears to be older women exacerbating another existing health inequality. More studies are  
297 needed into the factors driving these demographic changes to better understand and put in  
298 place measures to mitigate the impacts of lockdown of levels of physical activity.

299

## 300 **Conclusion**

301 This large-scale study reveals that the impacts of the pandemic on levels of physical activity  
302 have continued into the post-lockdown era. These impacts are increasing health inequalities  
303 affecting women, younger adults, the least fit and are having different impacts based upon  
304 the level of social deprivation within an area. The study also shows how valuable the parkrun  
305 results database can be for uncovering the demographics of engagement with a mass  
306 participation event.

307 With respect to parkrun the pandemic has had a number of negative impacts in Scotland. It  
308 has reduced attendances, it has increased the gender ratio towards males, it has increased  
309 the mean age of participants and their performance levels. This suggests that the pandemic  
310 has undone some of the important work that parkrun had done to increase inclusivity. Prior  
311 to the pandemic the gender ratio of participants was moving toward equality and the  
312 performance levels dropping year on year as parkrun became more inclusive and  
313 successfully removed barriers to women and the least fit taking part in exercise. The  
314 pandemic has reversed these trends. As parkrun is a very cheap and effective mechanism of  
315 increasing fitness and reducing burdens of healthcare systems government investment into  
316 parkrun is needed to help them overcome the negative impacts of the pandemic and help  
317 communities become more resilient to future pandemics [41].

318

## 319 Ethics approval

320 The ethics approval was obtained from the ethics review board of the University of Stirling  
321 (Reference No. EC 2023 14083 9598). There were no active participants in the study. This  
322 was an analysis of aggregated publicly available secondary datasets.

323

324

## 325 Availability of data and materials

326 The datasets used in the study are available in the University of Stirling DATAStorre.

327

## 328 Funding

329

330 This research received no specific grant from any funding agency in the public, commercial  
331 or not-for-profit sectors.

332

## 333 Competing interests

334 The author has competing interests and no connection to parkrun Global but is a keen  
335 parkrun participant and volunteer.

336

## 337 Acknowledgements

338 The author acknowledges the use of data owned by parkrun Global. The data have been  
339 accessed as a permitted act for independent non-commercial research purposes through fair



340 dealing legislation allowing access to publicly available databases. Only a tiny proportion of  
341 the parkrun results database was accessed (data from just 44 of more than 2000 events).

342

## 343 References

- 344 1. Hallal PC, Andersen LB, Bull FC, Guthold R, Haskell W, Ekelund U. Global physical  
345 activity levels: surveillance progress, pitfalls, and prospects. *The Lancet*. 2012;380:  
346 247–257. doi:10.1016/S0140-6736(12)60646-1
- 347 2. Bauman AE, Reis RS, Sallis JF, Wells JC, Loos RJ, Martin BW. Correlates of physical  
348 activity: why are some people physically active and others not? *The Lancet*. 2012;380:  
349 258–271. doi:10.1016/S0140-6736(12)60735-1
- 350 3. Kohl HW, Craig CL, Lambert EV, Inoue S, Alkandari JR, Leetongin G, et al. The  
351 pandemic of physical inactivity: global action for public health. *The Lancet*. 2012;380:  
352 294–305. doi:10.1016/S0140-6736(12)60898-8
- 353 4. Maditinos Z, Vassiliadis C, Tzavlopoulos Y, Vassiliadis SA. Sports events and the  
354 COVID-19 pandemic: assessing runners' intentions for future participation in running  
355 events – evidence from Greece. *Tourism Recreation Research*. 2021;46: 276–287.  
356 doi:10.1080/02508281.2020.1847422
- 357 5. McCarthy H, Potts HWW, Fisher A. Physical Activity Behavior Before, During, and After  
358 COVID-19 Restrictions: Longitudinal Smartphone-Tracking Study of Adults in the  
359 United Kingdom. *J Med Internet Res*. 2021;23: e23701. doi:10.2196/23701
- 360 6. Wong AY-Y, Ling SK-K, Louie LH-T, Law GY-K, So RC-H, Lee DC-W, et al. Impact of  
361 the COVID-19 pandemic on sports and exercise. *Asia-Pacific Journal of Sports  
362 Medicine, Arthroscopy, Rehabilitation and Technology*. 2020;22: 39–44.  
363 doi:10.1016/j.asmart.2020.07.006
- 364 7. Lee S, Lee C, Xu M, Li W, Ory M. People living in disadvantaged areas faced greater  
365 challenges in staying active and using recreational facilities during the COVID-19  
366 pandemic. *Health Place*. 2022;75: 102805. doi:10.1016/j.healthplace.2022.102805
- 367 8. Kyan A, Takakura M. Socio-economic inequalities in physical activity among Japanese  
368 adults during the COVID-19 pandemic. *Public Health*. 2022;207: 7–13.  
369 doi:10.1016/j.puhe.2022.03.006
- 370 9. Park AH, Zhong S, Yang H, Jeong J, Lee C. Impact of COVID-19 on physical activity: A  
371 rapid review. *J Glob Health*. 2022;12: 05003. doi:10.7189/jogh.12.05003
- 372 10. Jago R, Salway R, House D, Walker R, Emm-Collison L, Sansum K, et al. Short and  
373 medium-term effects of the COVID-19 lockdowns on child and parent accelerometer-  
374 measured physical activity and sedentary time: a natural experiment. *Int J Behav Nutr  
375 Phys Act*. 2023;20: 1–15. doi:10.1186/s12966-023-01441-1

- 376 11. Walker R, House D, Emm-Collison L, Salway R, Tibbitts B, Sansum K, et al. A multi-  
377 perspective qualitative exploration of the reasons for changes in the physical activity  
378 among 10–11-year-old children following the easing of the COVID-19 lockdown in the  
379 UK in 2021. *Int J Behav Nutr Phys Act.* 2022;19: 1–13. doi:10.1186/s12966-022-01356-  
380 3
- 381 12. Salway R, Foster C, de Vocht F, Tibbitts B, Emm-Collison L, House D, et al.  
382 Accelerometer-measured physical activity and sedentary time among children and their  
383 parents in the UK before and after COVID-19 lockdowns: a natural experiment. *Int J*  
384 *Behav Nutr Phys Act.* 2022;19: 1–14. doi:10.1186/s12966-022-01290-4
- 385 13. Watson KB, Whitfield GP, Huntzicker G, Omura JD, Ussery E, Chen TJ, et al. Cross-  
386 sectional study of changes in physical activity behavior during the COVID-19 pandemic  
387 among US adults. *Int J Behav Nutr Phys Act.* 2021;18: 1–10. doi:10.1186/s12966-021-  
388 01161-4
- 389 14. Magutah K, Mbuthia G. Physical activity engagement in Eldoret, Kenya, during COVID-  
390 19 pandemic. *PLOS Global Public Health.* 2022;2: e0000339.  
391 doi:10.1371/journal.pgph.0000339
- 392 15. Nosaka K, Fox-Harding C, Nosaka K. Impact of COVID-19 lockdown on physical  
393 activity behaviours of older adults who participated in a community-based exercise  
394 program prior to the lockdown. *PLOS Global Public Health.* 2022;2: e0001217.  
395 doi:10.1371/journal.pgph.0001217
- 396 16. Guthold R, Stevens GA, Riley LM, Bull FC. Global trends in insufficient physical activity  
397 among adolescents: a pooled analysis of 298 population-based surveys with 1.6 million  
398 participants. *Lancet Child Adolesc Health.* 2020;4: 23–35. doi:10.1016/S2352-  
399 4642(19)30323-2
- 400 17. World Health Organization. Global action plan on physical activity 2018–2030: more  
401 active people for a healthier world. 2018 [cited 5 Apr 2023]. Available:  
402 <https://www.who.int/publications-detail-redirect/9789241514187>
- 403 18. Cleland V, Nash M, Sharman MJ, Claflin S. Exploring the Health-Promoting Potential of  
404 the “parkrun” Phenomenon: What Factors are Associated With Higher Levels of  
405 Participation? *Am J Health Promot.* 2019;33: 13–23. doi:10.1177/0890117118770106
- 406 19. de Vries L, Kotze N, Morton McKay T. Parks, participation and the Parkrun ‘move-ment’  
407 in South Africa. *South African Geographical Journal.* 2022;104: 382–396.  
408 doi:10.1080/03736245.2022.2087727
- 409 20. Haake S, Heller B, Schneider P, Smith R, Green G. The influence of neighbourhood  
410 equity on parkrunners in a British city. *Health Promotion International.* 2022;37:  
411 daab138. doi:10.1093/heapro/daab138
- 412 21. Stevens M, Rees T, Polman R. Social identification, exercise participation, and positive  
413 exercise experiences: Evidence from parkrun. *Journal of Sports Sciences.* 2018;37: 1–  
414 8. doi:10.1080/02640414.2018.1489360
- 415 22. Gilburn AS. New Parkrunners Are Slower and the Attendance Gender Gap Narrowing  
416 Making Parkrun More Inclusive. *Int J Environ Res Public Health.* 2023;20: 3602.  
417 doi:10.3390/ijerph20043602

- 418 23. Reece LJ, Owen K, Graney M, Jackson C, Shields M, Turner G, et al. Barriers to  
419 initiating and maintaining participation in parkrun. *BMC Public Health*. 2022;22: 83.  
420 doi:10.1186/s12889-022-12546-w
- 421 24. Peterson BJ, Withers B, Hawke F, Spink M, Callister R, Chuter VH. Outcomes of  
422 participation in parkrun, and factors influencing why and how often individuals  
423 participate : a systematic review of quantitative studies. *Journal of Sports Sciences*.  
424 2022; 1486–1499. doi:10.1080/02640414.2022.2086522
- 425 25. Quirk H, Bullas A, Haake S, Goyder E, Graney M, Wellington C, et al. Exploring the  
426 benefits of participation in community-based running and walking events: a cross-  
427 sectional survey of parkrun participants. *BMC Public Health*. 2021;21: 1978.  
428 doi:10.1186/s12889-021-11986-0
- 429 26. Smith RA, Schneider PP, Cosulich R, Quirk H, Bullas AM, Haake SJ, et al.  
430 Socioeconomic inequalities in distance to and participation in a community-based  
431 running and walking activity: A longitudinal ecological study of parkrun 2010 to 2019.  
432 *Health & Place*. 2021;71: 102626. doi:10.1016/j.healthplace.2021.102626
- 433 27. Stevinson C, Hickson M. Exploring the public health potential of a mass community  
434 participation event. *J Public Health (Oxf)*. 2014;36: 268–274.  
435 doi:10.1093/pubmed/fdt082
- 436 28. Gilburn AS. Predictors of successful return to parkrun for first-time adult participants in  
437 Scotland. *PLOS Global Public Health*. 2023;3: e0001786.  
438 doi:10.1371/journal.pgph.0001786
- 439 29. Quirk H, Haake S, Goyder E, Bullas A, Graney M, Wellington C. Change in health,  
440 wellbeing and physical activity levels during the COVID-19 pandemic: a longitudinal  
441 cohort of parkrun participants in the United Kingdom. *Health Promotion International*.  
442 2022; daac012. doi:10.1093/heapro/daac012
- 443 30. Fullagar S, Petris S, Sargent J, Allen S, Akhtar M, Ozakinci G. Action research with  
444 parkrun UK volunteer organizers to develop inclusive strategies. *Health Promot Int*.  
445 2020;35: 1199–1209. doi:10.1093/heapro/daz113
- 446 31. Fleming J, Bryce C, Parsons J, Wellington C, Dale J. Engagement with and delivery of  
447 the “parkrun practice initiative” in general practice: a mixed methods study. *Br J Gen  
448 Pract*. 2020;70: e573–e580. doi:10.3399/bjgp20X710453
- 449 32. Haake S, Quirk H, Bullas A. parkrun and the promotion of physical activity: insights for  
450 primary care clinicians from an online survey. *Br J Gen Pract*. 2022;72: e634–e640.  
451 doi:10.3399/BJGP.2022.0001
- 452 33. Fixsen A, Barrett S. Challenges and Approaches to Green Social Prescribing During  
453 and in the Aftermath of COVID-19: A Qualitative Study. *Frontiers in Psychology*.  
454 2022;13. Available: <https://www.frontiersin.org/articles/10.3389/fpsyg.2022.861107>
- 455 34. parkrun statsgeek group | Version 4.6 of this macro that converts a parkrun results  
456 page into a useful and function rich Excel table | Facebook. [cited 12 Apr 2023].  
457 Available:  
458 <https://www.facebook.com/groups/parkrunstatsgeeks/permalink/3166888586881628>

- 459 35. SIMD (Scottish Index of Multiple Deprivation). In: Scottish Index of Multiple Deprivation  
460 [Internet]. [cited 12 Apr 2023]. Available: <http://simd.scot/>
- 461 36. R: The R Project for Statistical Computing. [cited 12 Apr 2023]. Available:  
462 <https://www.r-project.org/>
- 463 37. Bates D, Mächler M, Bolker B, Walker S. Fitting Linear Mixed-Effects Models Using  
464 lme4. *Journal of Statistical Software*. 2015;67: 1–48. doi:10.18637/jss.v067.i01
- 465 38. Lin R, Hu X, Chen S, Huang J. Sports Participation and Anti-Epidemic: Empirical  
466 Evidence on the Influence of Regular Physical Activity on the COVID-19 Pandemic in  
467 Mainland China. *International Journal of Environmental Research and Public Health*.  
468 2022;19: 10689. doi:10.3390/ijerph191710689
- 469 39. Rogers NT, Waterlow NR, Brindle H, Enria L, Eggo RM, Lees S, et al. Behavioral  
470 Change Towards Reduced Intensity Physical Activity Is Disproportionately Prevalent  
471 Among Adults With Serious Health Issues or Self-Perception of High Risk During the  
472 UK COVID-19 Lockdown. *Frontiers in Public Health*. 2020;8. Available:  
473 <https://www.frontiersin.org/articles/10.3389/fpubh.2020.575091>
- 474 40. Wheatley D, Bickerton C. Valuing subjective well-being benefits from leisure activities:  
475 informing post-Covid public funding of arts, culture and sport. *Annals of Leisure  
476 Research*. 2022;0: 1–19. doi:10.1080/11745398.2022.2099436
- 477 41. Pronk NP, Faghy MA. Causal systems mapping to promote healthy living for pandemic  
478 preparedness: a call to action for global public health. *Int J Behav Nutr Phys Act*.  
479 2022;19: 1–4. doi:10.1186/s12966-022-01255-7

480

481

## 482 **Tables and Figures**

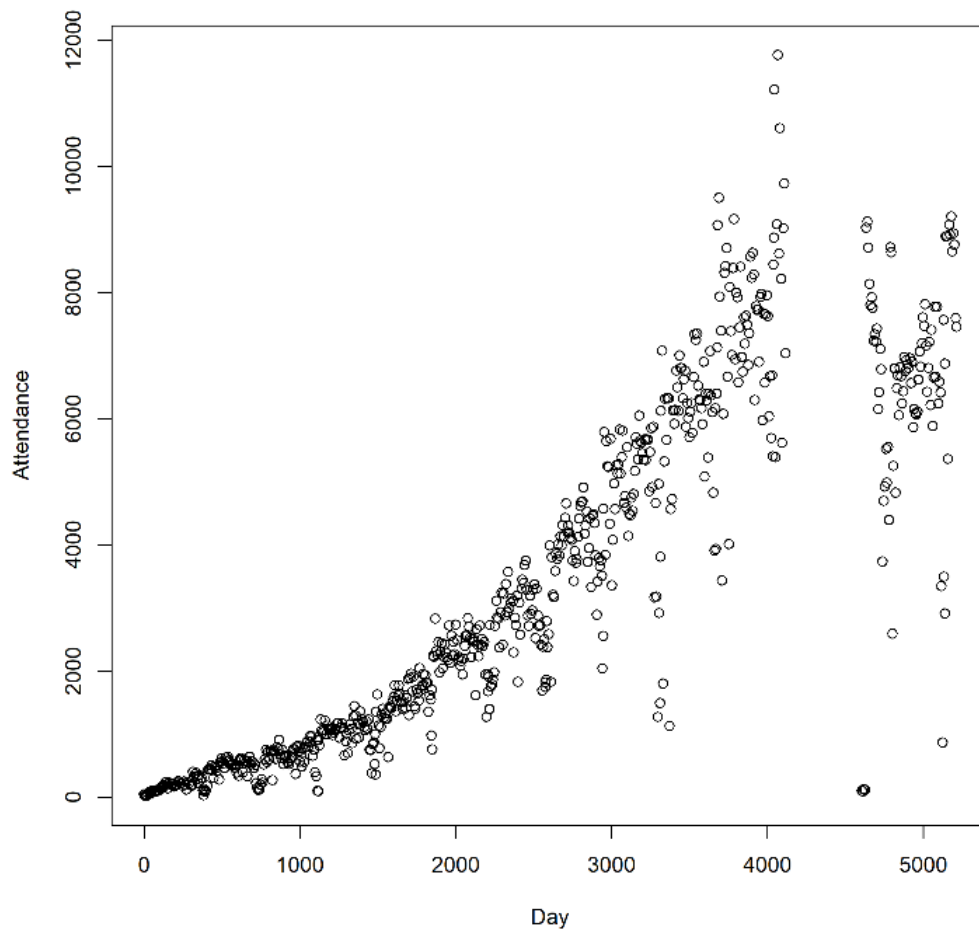

483

484 Fig 1. Total attendance on each parkrun day in Scotland from day 0, 6<sup>th</sup> December 2008 until  
485 March 18<sup>th</sup> 2023.

486

487

medRxiv preprint doi: <https://doi.org/10.1101/2023.08.30.23294836>; this version posted September 1, 2023. The copyright holder for this preprint (which was not certified by peer review) is the author/funder, who has granted medRxiv a license to display the preprint in perpetuity. It is made available under a [CC-BY 4.0 International license](https://creativecommons.org/licenses/by/4.0/).

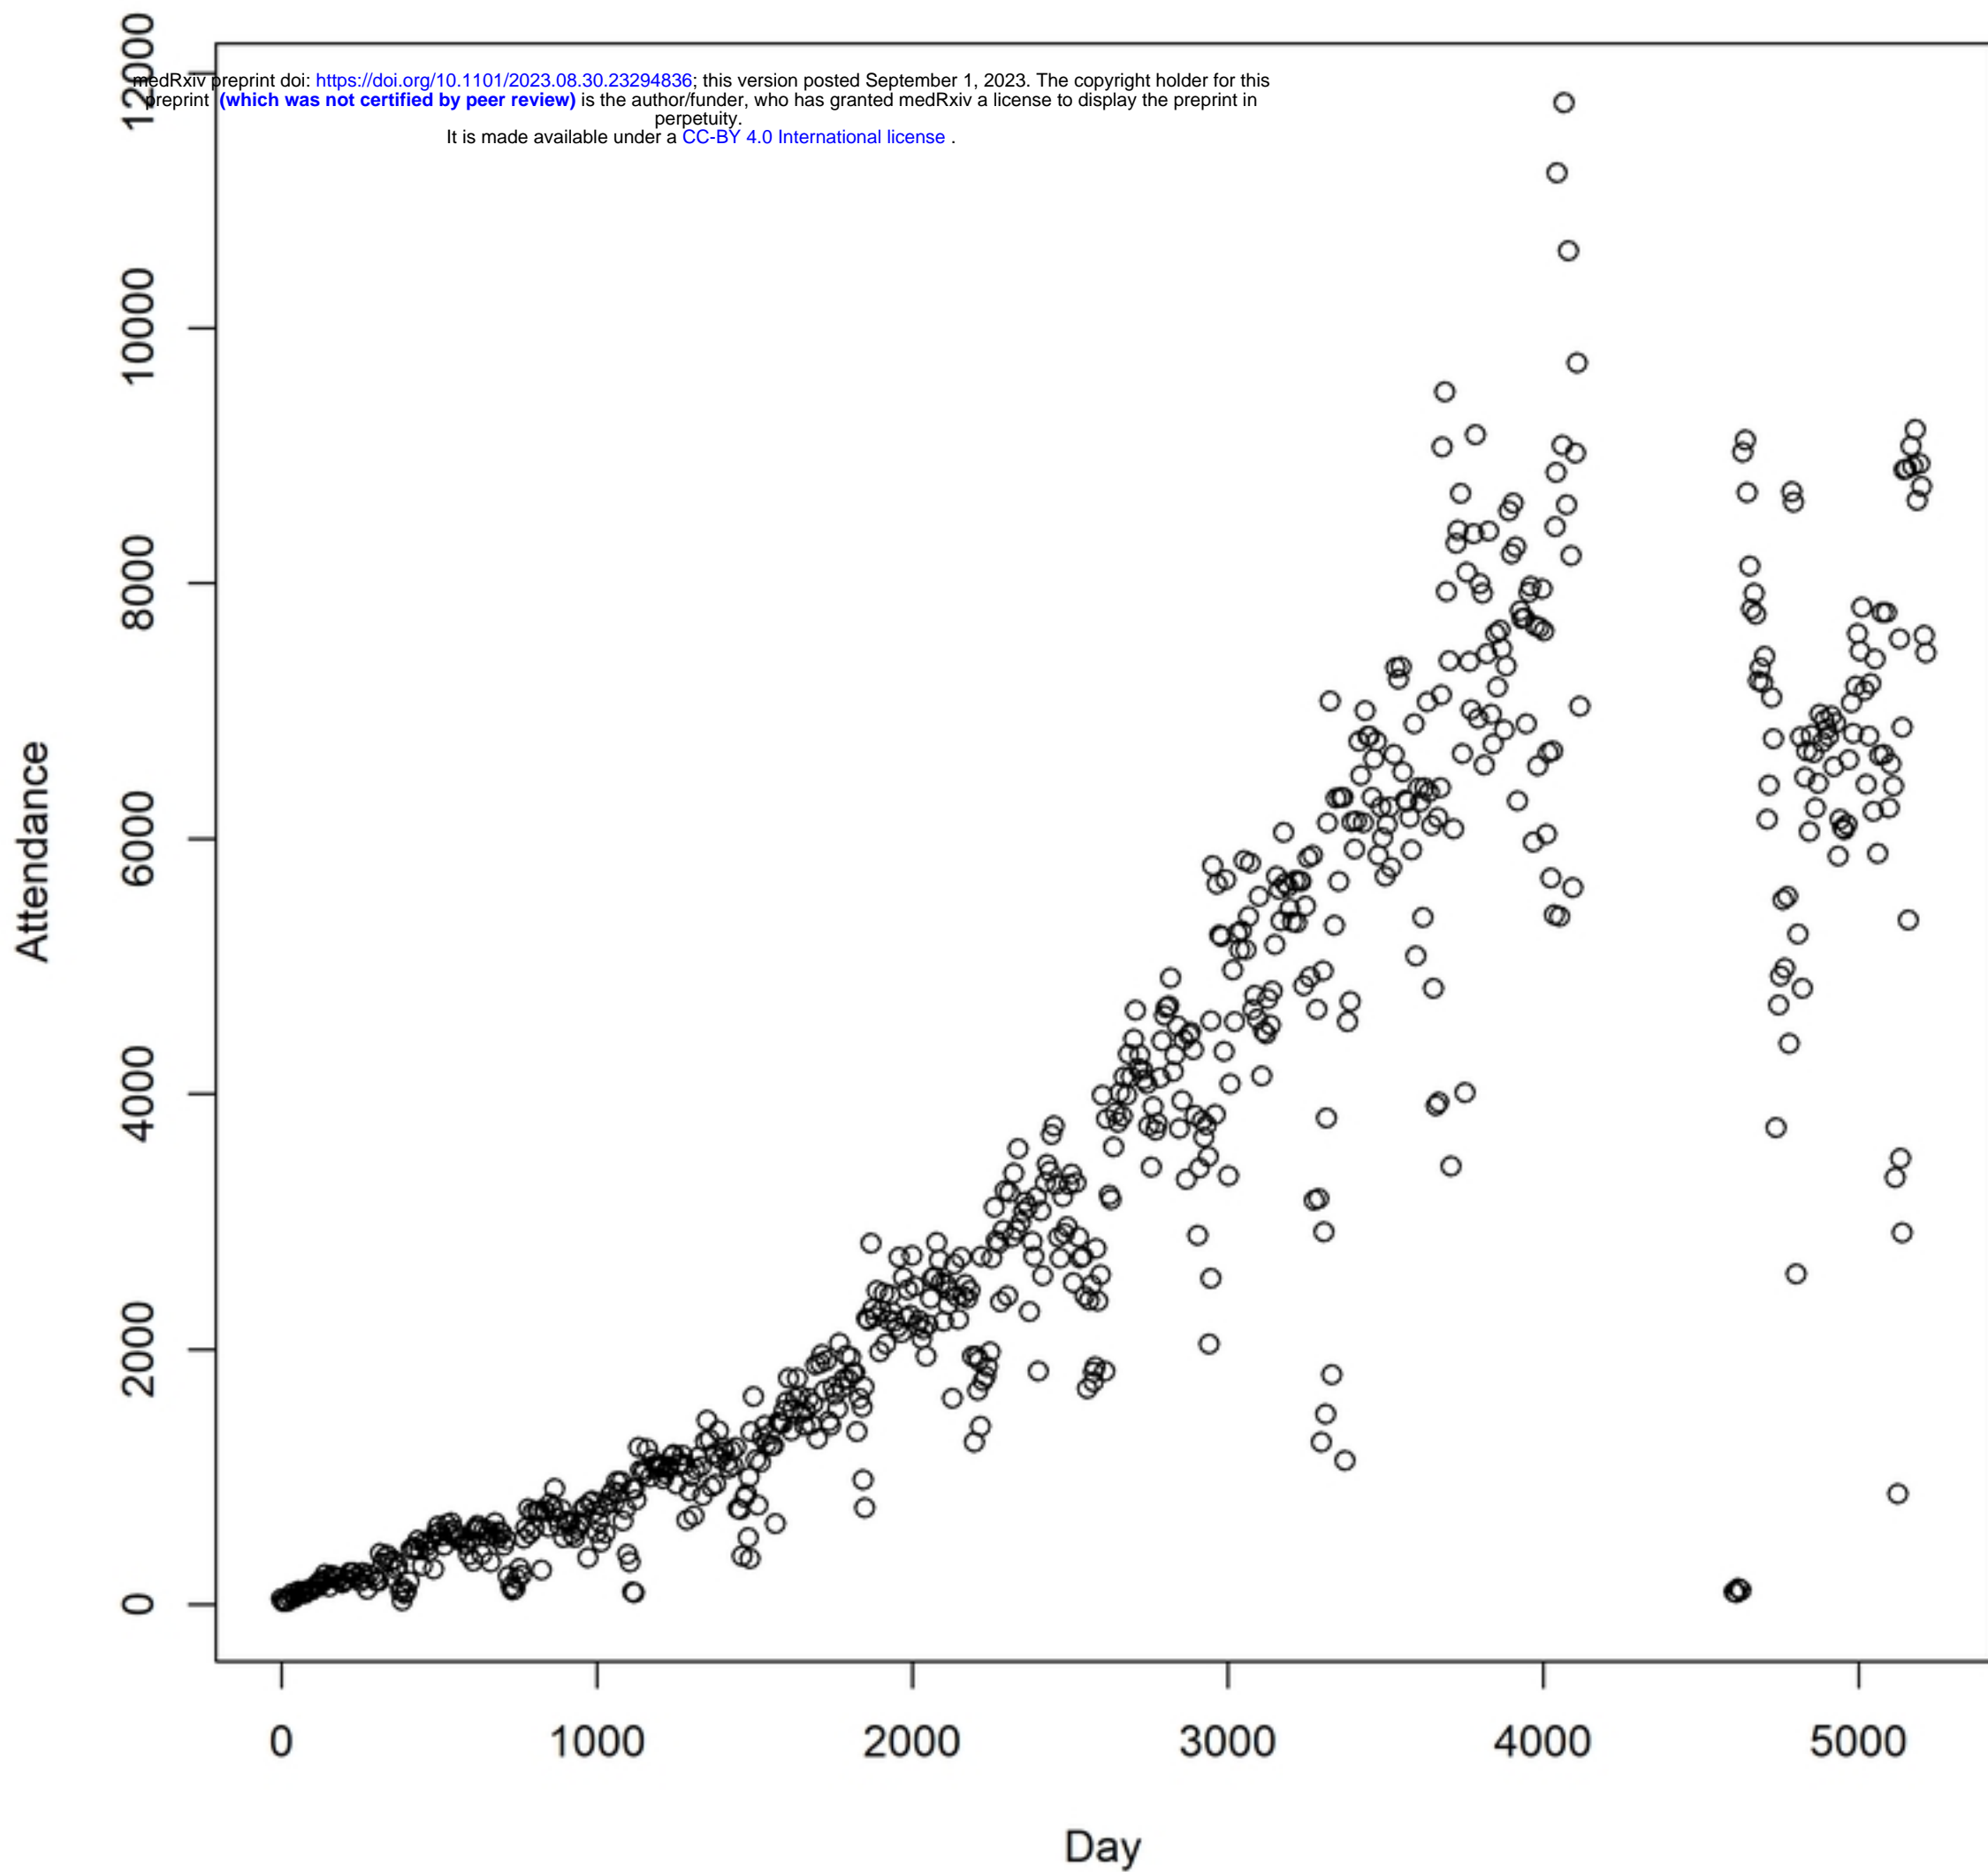

Figure
